# Supplementary material for: Case report: Clinical and immunohistochemical manifestations of suspected Sjogren's disease in a dog
Source: Front Vet Sci. 2024 Nov 27;11:1479363. doi: 10.3389/fvets.2024.1479363 (PMC11659782; doi:10.3389/fvets.2024.1479363)
Supplement: Supplementary file 1 [file Table_1.xlsx]

## Sheet: Profile - raw results
Project Information						AB Q7 Analysis Parameters
Report Date:	2024-07-09		Samples on Plate:	258		Threshold:		0.1
PI:	XXX		qPCR Q7 Plate:	731		Baseline:		3 to 15
Researcher:						Cycling conditions:	1X	50C for 2 min
Master Mix:	Applied Biosystems TaqMan Universal PCR Master Mix (cat # 4318157)						1X	95C for 10 min
DNA Extraction:	Qiagen QIAamp DNA FFPE kit (56404)						40X	95C for 15 sec
cDNA synthesis:	Thermo Fisher SSIV Vilo Mastermix (cat # 11766500)							60C for 1 min
Assay:	Assay-On-Demand, Cf02627844_m1
			qPCR results (Cq values)
Sample #	Sample Name	Location	CD4	cGAPDH
1	A82-05453707, A, 020246	258:C7	27.04	28.1
2	23B2044 T18	258:D7	27.39	28.84
	Negative control (DEPC-treated water)		negative	negative

## Sheet: Experimental-to-control calcs
Delta-delta Cq value calculations
			Raw results
			Cq values of Genes of interest (GOI)	Reference Gene
Sample #	Sample Name		CD4	cGAPDH
1	A82-05453707, A, 020246	Experimental	27.04	28.1
2	23B2044 T18	Control	27.39	28.84
			Normalized value (GOI- Reference Genes) or delta Cq
			CD4
1	A82-05453707, A, 020246	Experimental	-1.06
2	23B2044 T18	Control	-1.45
			Calibrated Value or delta delta Cq = (Normalized Cq of experimental sample - Normalized Cq of control sample)
			CD4
1	A82-05453707, A, 020246	Experimental	0.39
			Linearized Value or 2^-delta delta Cq
			CD4
1	A82-05453707, A, 020246	Experimental	0.76313
			Fold change (negative values are downregulated, positive values are upregulated)
			CD4
1	A82-05453707, A, 020246	Experimental	-1.31039
